# Supplementary material
Source: Springer Nature journal article supplement (https://www.springermedizin.de/resource/supplementary/12968_2008_56_MOESM3_ESM.pdf/9577888)

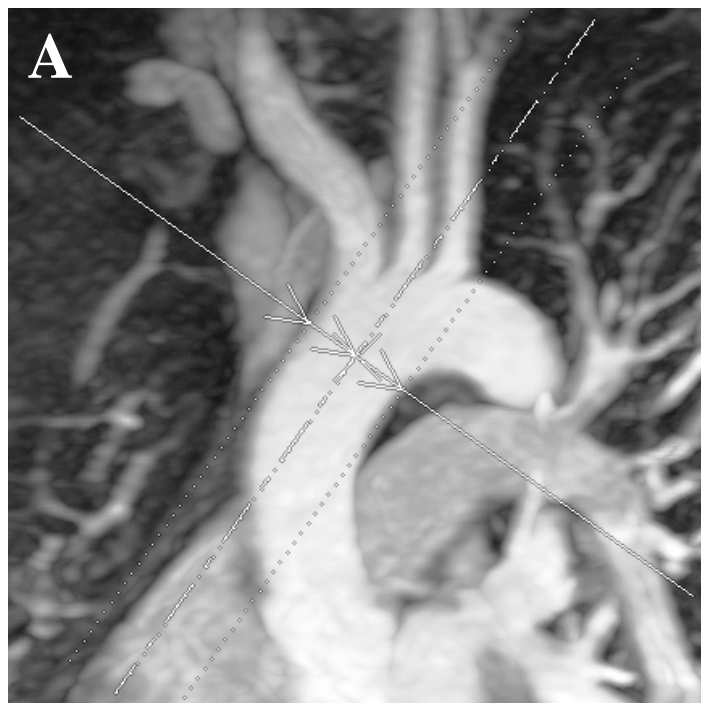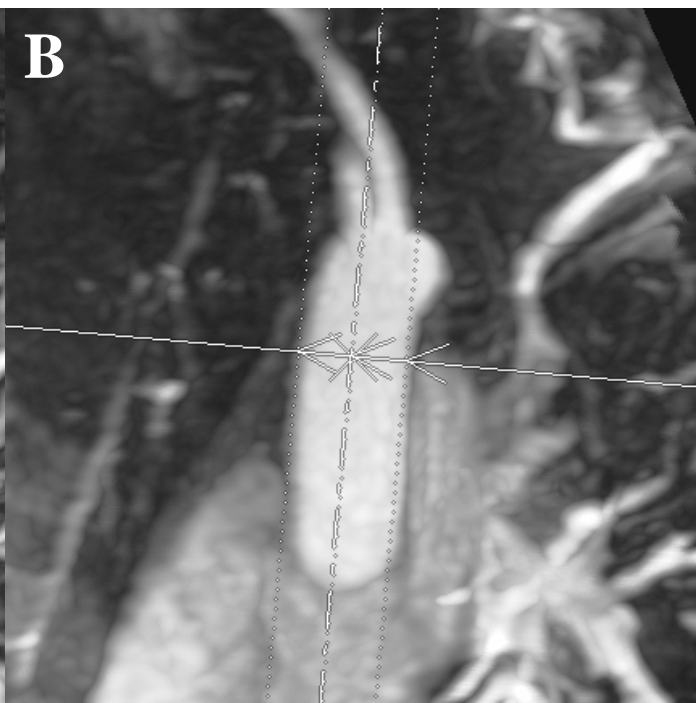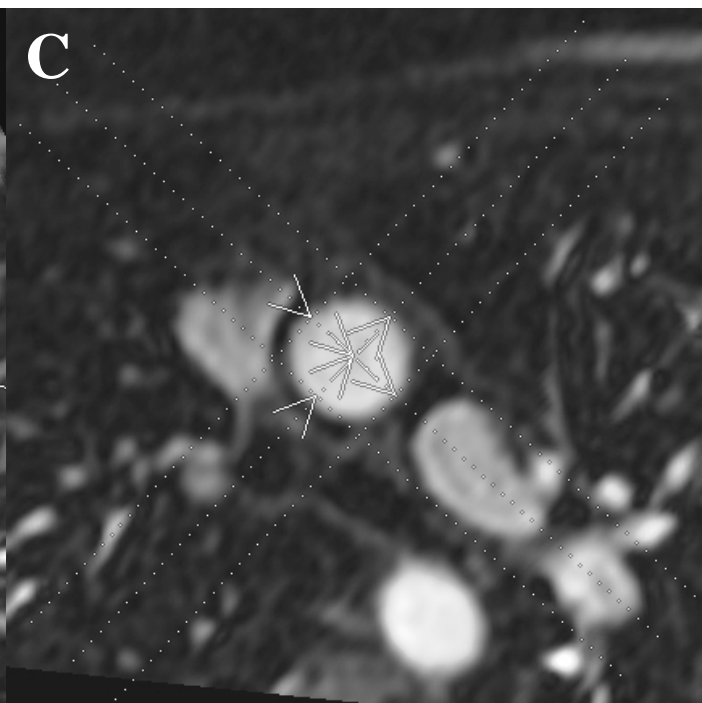

Supplement: MOESM3 [file 9577888]
